# Supplementary material
Source: publisher site journal article supplement (https://www.dovepress.com/article/545422)
Supplement: Supplementary file 1 [file 545422%20Supplementary%20items.docx]

**Table S1** The PWAS of Membranous Nephropathy Integrating the ARIC pQTLs with Membranous Nephropathy GWAS Using FUSION Identified 3 Plasma Protein

| **Protein** | **CHR** | **TWAS.Z** | **TWAS.P** | **FDR** |
| --- | --- | --- | --- | --- |
| PLA2R1 | 2 | 13.74 | 5.47E-43 | 5.19E-40 |
| LY75 | 2 | -4.05 | 5.21E-05 | 2.47E-02 |
| TIMP4 | 3 | -3.93 | 8.44E-05 | 2.67E-02 |

**Abbreviations:** PWAS, proteome-wide association study; ARIC, Atherosclerosis Risk in Communities; pQTLs, protein quantitative trait locus; GWAS, genome-wide association studies; CHR, chromosome; TWAS, transcriptome-wide association study; TWAS.Z, TWAS association Z-score; TWAS.P, nominal TWAS P-value; FDR, false discovery rate.

**Table S2** The TWAS of Membranous Nephropathy Integrating the GTEx V8 Whole Blood eQTLs with Membranous Nephropathy GWAS Using FUSION Identified 3 mRNAs

| **Gene** | **CHR** | **TWAS.Z** | **TWAS.P** | **FDR** |
| --- | --- | --- | --- | --- |
| LY75 | 2 | -9.08 | 1.04E-19 | 8.60E-16 |
| POLR2I | 19 | -5.16 | 2.47E-07 | 6.81E-04 |
| NFKB1 | 4 | 4.25 | 2.11E-05 | 3.49E-02 |

**Abbreviations:** TWAS, transcriptome-wide association study; eQTLs, expression quantitative trait locus; GWAS, genome-wide association studies; CHR, chromosome; TWAS.Z, TWAS association Z-score; TWAS.P, nominal TWAS P-value; FDR, false discovery rate.

**Table S3** The TWAS of Membranous Nephropathy Integrating the GTEx V8 Kidney Cortex eQTLs with Membranous Nephropathy GWAS Using FUSION Identified 1 mRNA

| **Gene** | **CHR** | **TWAS.Z** | **TWAS.P** | **FDR** |
| --- | --- | --- | --- | --- |
| LY75 | 2 | -10.28 | 8.49E-25 | 1.14E-21 |

**Abbreviations:** TWAS, transcriptome-wide association study; eQTLs, expression quantitative trait locus; GWAS, genome-wide association studies; CHR, chromosome; TWAS.Z, TWAS association Z-score; TWAS.P, nominal TWAS P-value; FDR, false discovery rate.

**Table S4** SMR Analysis of 3 Plasma Proteins Identified in PWAS of Membranous Nephropathy

| **Protein** | **CHR** | **b_SMR** | **se_SMR** | **p_SMR** | **p_HEIDI** |
| --- | --- | --- | --- | --- | --- |
| PLA2R1 | 2 | 0.82 | 0.06 | 6.19E-46 | 3.95E-07 |
| LY75 | 2 | -0.37 | 0.05 | 3.50E-13 | 1.32E-10 |
| TIMP4 | 3 | -0.50 | 0.14 | 3.61E-04 | 3.49E-01 |

**Notes:** b_SMR indicated the SMR effect size estimate, and se_SMR was its standard error. p_SMR was the nominal P-value for the SMR test. p_HEIDI was the P-value from the HEIDI test.

**Abbreviations:** SMR, summary data-based Mendelian Randomization; PWAS, proteome-wide association study; CHR, chromosome; SNP, single nucleotide polymorphism; HEIDI, heterogeneity in dependent instruments.

**Table S5** SMR Analysis of 2 mRNAs Identified in TWAS of Membranous Nephropathy Using GTEx V8 Whole Blood eQTLs

| **Protein** | **CHR** | **b_SMR** | **se_SMR** | **p_SMR** | **p_HEIDI** |
| --- | --- | --- | --- | --- | --- |
| LY75 | 2 | -0.70 | 0.09 | 1.76E-14 | 1.62E-09 |
| POLR2I | 19 | -0.59 | 0.34 | 8.14E-02 | 3.86E-01 |

**Notes:** b_SMR indicated the SMR effect size estimate, and se_SMR was its standard error. p_SMR was the nominal P-value for the SMR test. p_HEIDI was the P-value from the HEIDI test.

**Abbreviations:** SMR, summary data-based Mendelian Randomization; TWAS, transcriptome-wide association study; CHR, chromosome; eQTLs, expression quantitative trait locus; SNP, single nucleotide polymorphism; HEIDI, heterogeneity in dependent instruments.

**Table S6** SMR Analysis of 1 mRNA Identified in TWAS of Membranous Nephropathy Using GTEx V8 Kidney Cortex eQTLs

| **Protein** | **CHR** | **b_SMR** | **se_SMR** | **p_SMR** | **p_HEIDI** |
| --- | --- | --- | --- | --- | --- |
| LY75 | 2 | -0.60 | 0.12 | 6.68E-07 | 1.80E-03 |

**Notes:** b_SMR indicated the SMR effect size estimate, and se_SMR was its standard error. p_SMR was the nominal P-value for the SMR test. p_HEIDI was the P-value from the HEIDI test.

**Abbreviations:** SMR, summary data-based Mendelian Randomization; TWAS, transcriptome-wide association study; CHR, chromosome; eQTLs, expression quantitative trait locus; SNP, single nucleotide polymorphism; HEIDI, heterogeneity in dependent instruments.

**Table S7** Bayesian Colocalization Analysis of 3 Plasma Proteins Identified from PWAS

| **Protein** | **SNP** | **Source of proxy for summary data** | **PP.H4** | **Colocalization evidence** |
| --- | --- | --- | --- | --- |
| PLA2R1 | 1624 | deCODE pQTLs | 7.48E-23 | No |
| LY75 | 1909 | deCODE pQTLs | 8.43E-01 | Yes |
| TIMP4 | 1976 | deCODE pQTLs | 8.01E-01 | Yes |

**Abbreviations:** PWAS, proteome-wide association study; pQTLs, protein quantitative trait locus; SNP, single nucleotide polymorphism; PP.H4, posterior probabilities H4.

**Table S8** Bayesian Colocalization Analysis of 4 mRNAs Identified from TWAS

| **Protein** | **SNP** | **Source of proxy for summary data** | **PP.H4** | **Colocalization evidence** |
| --- | --- | --- | --- | --- |
| LY75 | 2340 | kidney cortex eQTLs | 8.51E-02 | No |
| NFKB1 | 1726 | whole blood eQTLs | 7.74E-01 | No |
| POLR2I | 1109 | whole blood eQTLs | 3.77E-01 | No |
| LY75 | 2394 | whole blood eQTLs | 1.25E-25 | No |

**Abbreviations:** TWAS, transcriptome-wide association study; eQTLs, expression quantitative trait locus; SNP, single nucleotide polymorphism; PP.H4, posterior probabilities H4.

**Table S9** Summary of Results for Evidence Grading

| **Molecular Feature** | **Evidence source** | **Discovery** | | **Colocalization** | **SMR** | **Category** |
| --- | --- | --- | --- | --- | --- | --- |
| **TWAS.Z** | **FDR** |
| PLA2R1 | PWAS | 13.74 | 5.19E-40 | No | No | Tier 3 |
| LY75 | PWAS | -4.05 | 2.47E-02 | Yes | No | Tier 2 |
| TIMP4 | PWAS | -3.93 | 2.67E-02 | Yes | Yes | Tier 1 |
| LY75 | TWAS (whole blood) | -9.08 | 8.60E-16 | No | No | Tier 3 |
| POLR2I | TWAS (whole blood) | -5.16 | 6.81E-04 | No | No | Tier 3 |
| NFKB1 | TWAS (whole blood) | 4.25 | 3.49E-02 | No | No | Tier 3 |
| LY75 | TWAS (kidney cortex) | -10.28 | 1.14E-21 | No | No | Tier 3 |

**Abbreviations:** PWAS, Proteome-wide association study; TWAS, Transcriptome-wide association study; TWAS.Z, TWAS association Z-score; FDR, false discovery rate; SMR, summary data-based Mendelian Randomization.

**Table S10** Characteristics of Membranous Nephropathy Patients Stratified by PLA2R Antibody Status

| **Variables** | **All patients**  **(n=42)** | **PLA2R antibody status** | | ***P* value** |
| --- | --- | --- | --- | --- |
| **Negative (n=17)** | **Positive (n=25)** |
| Gender, n (%) |  |  |  | 0.12 |
| Female | 16 (38.1) | 9 (52.9) | 7 (28.0) |  |
| Male | 26 (61.9) | 8 (47.1) | 18 (72.0) |  |
| Age (years) | 56.8 ± 12.7 | 56.6 ± 13.4 | 56.9 ± 12.5 | 0.94 |
| BMI (kg/m2) | 24.4 ± 3.3 | 23.6 ± 2.7 | 24.8 ± 3.6 | 0.24 |
| Hypertension, n (%) | 17 (40.5) | 6 (35.3) | 11 (44.0) | 0.75 |
| CAD, n (%) | 3 (7.1) | 1 (5.9) | 2 (8.0) | 1 |
| Diabetes, n (%) | 2 (4.8) | 0 (0.0) | 2 (8.0) | 0.51 |
| UACR (mg/g) | 2528.2 (582.0, 5289.0) | 1156.7 (528.8, 3876.4) | 3581.1 (1632.6, 6597.8) | 0.12 |
| Albumin (g/L) | 32.2 ± 9.5 | 33.4 ± 9.0 | 31.4 ± 9.9 | 0.51 |
| eGFR (mL/min/1.73m2) | 85.5 ± 18.0 | 87.8 ± 16.5 | 84.0 ± 19.1 | 0.5 |

**Notes:** Data were presented as number (percentage) or median (interquartile range) as appropriate.

**Abbreviations:** BMI, body mass index; CAD, coronary artery disease; PLA2R, phospholipase A2 receptor; UACR, urine albumin creatine ratio; eGFR, estimate glomerular filtration rate.

**Table S11** Candidate Drug Prediction in This Study

| **Term** | ***P* value** | **Odds Ratio** | **Combined Score** | **Genes** |
| --- | --- | --- | --- | --- |
| POVPC CTD 00003737 | ＜0.01 | 19985 | 143801.31 | TIMP4 |
| scriptaid CTD 00003819 | ＜0.01 | 19940 | 115834.63 | TIMP4 |
| isoproterenol CTD 00006175 | ＜0.01 | 19921 | 110243.9 | TIMP4 |
| 3-(1-methylpyrrolidin-2-yl)pyridine  CTD 00006393 | 0.03 | 19501 | 71976.01 | TIMP4 |
| Fonofos CTD 00005884 | 0.04 | 19288 | 64333.48 | TIMP4 |
| TERBUFOS CTD 00000658 | 0.04 | 19285 | 64242.39 | TIMP4 |
| parathion CTD 00006472 | 0.04 | 19224 | 62465.31 | TIMP4 |
